# Supplementary material for: Identification of Barramundi (Lates calcarifer) DC-SCRIPT, a Specific Molecular Marker for Dendritic Cells in Fish
Source: PubMed Central journal article supplement (PMC4501824; doi:10.1371/journal.pone.0132687), 2015-07-14
Supplement: pone.0132687.s001.pdf [file pone.0132687.s001.pdf]

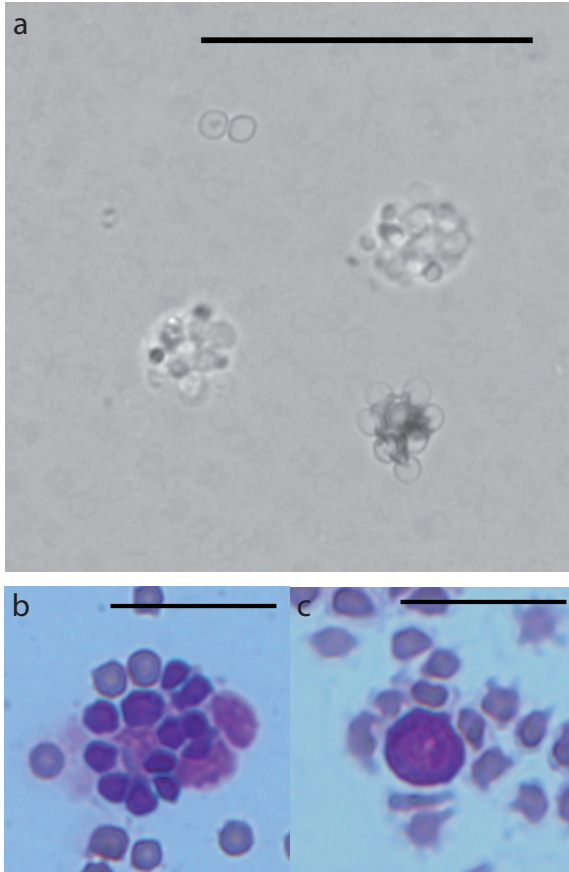

**S1 Fig. E-rosettes.** (a) Inverted light microscopy of rosette formations. (b-c) Rosettes stained with Hemacolour. Scale bars represent 50  $\mu\text{m}$  in (a) and 20  $\mu\text{m}$  in (b) and (c).
