# Supplementary material for: Identification of Barramundi (Lates calcarifer) DC-SCRIPT, a Specific Molecular Marker for Dendritic Cells in Fish
Source: PubMed Central journal article supplement (PMC4501824; doi:10.1371/journal.pone.0132687), 2015-07-14
Supplement: pone.0132687.s002.pdf [file pone.0132687.s002.pdf]

**a**

NP\_571565.1| major histocompatibility complex class II integral membrane alpha chain precursor [Danio rerio]  
 MFFLALRKMEVYVFILTLVSVFVSSEVNVVHEDIVMDGCSDEKEYISVLDGEEMYHT  
 DFSGKRGEMTLPDFADPFTYPTGTYEQSLADYETCKHNLDFVAAKAYKSPLEKLDPPQT  
 SIYSRDDVQPDIEKLIHVVTGFFPPPVRVSWTKNNEIVTEGMSVSQYRPNNNDGTYN  
 IFSTLRFPTVEGDIYSCSVNHKTLEQPQTKAWEVEVAMPVSGPAVFCGVGLFLGLLG  
 VAAGTFFLIKGNNCN

|                      |                                                   |
|----------------------|---------------------------------------------------|
| <i>D. rerio</i>      | LICHVTGFF <b>PPPVRVSWT</b> KNNEIVTEGMSVSQYRPNNNDG |
| <i>L. calcarifer</i> | LICHVSGFY <b>PAPVNVSWT</b> KNEQKVTEGTSINVPFPLKDG  |
| <i>M. zebra</i>      | LICHVTGFI <b>PAPVNVSWT</b> KNGQKVT-GSSINVPYPNKDG  |
| <i>O. niloticus</i>  | LICHVTGFI <b>PAPVNVSWT</b> KNQKVT-GSTINVPYPNKDG   |
|                      | *****:**:*.***.****** : ***** : : . * : **        |

**b**

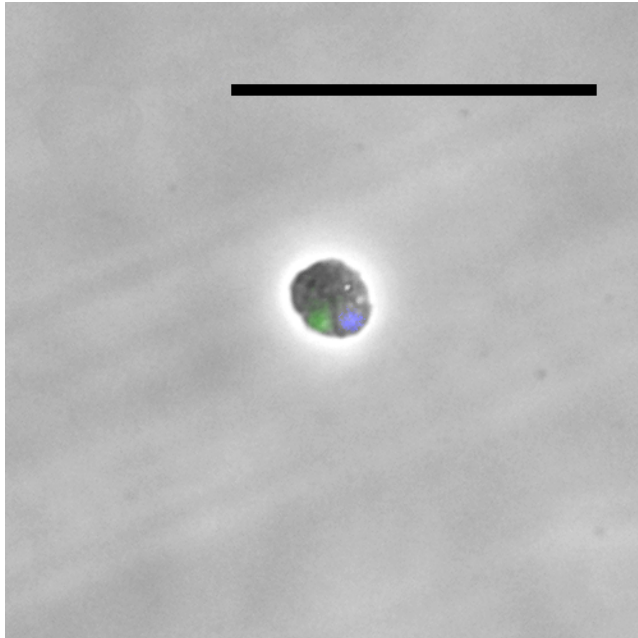

**S2 Fig. Rabbit Anti-zebrafish MHCIIa (Sapphire Bioscience)**

a) Synthesised peptide amino acid sequence, showing MHCIIa antigen (green) and MHCII-Ig superfamily domains (purple). Alignment: A subsection of exon from *L. calcarifer* partial gDNA sequence is highly conserved across *D. rerio*, *L. calcarifer*, *M. zebra* and *O. niloticus*. A B-cell epitope region is indicated (shaded, bold) showing very high conservation across several fish orders (Standard ClustalW2 notation to indicate similarity/identity). b) Co-staining of B-lymphocyte from *L. calcarifer* with rabbit anti-zebrafish MHCIIa antibody (green), sheep anti-barramundi IgM (blue)
